# Supplementary material
Source: HighWire-hosted journal article supplement (https://www.jrheum.org/highwire/filestream/41042/field_highwire_adjunct_files/0/210888DataSuppl.pdf)
Supplement: 210888DataSuppl.pdf [file 210888DataSuppl.pdf]

## Contents

|                                                                                                                                                                                                                           |                                     |
|---------------------------------------------------------------------------------------------------------------------------------------------------------------------------------------------------------------------------|-------------------------------------|
| SUPPLEMENTARY METHODS.....                                                                                                                                                                                                | 1                                   |
| US Optum <sup>®</sup> deidentified COVID-19 electronic health record dataset (2007–2020) .....                                                                                                                            | 1                                   |
| Indicated cohort inclusion.....                                                                                                                                                                                           | 3                                   |
| International Classification of Diseases, 10th Revision, Clinical Modification<br>diagnosis code list for study endpoints and variables .....                                                                             | 3                                   |
| <i>Supplementary Table S1.</i> Baseline* demographics and characteristics of patients in the<br>indicated cohorts by systemic therapy .....                                                                               | <b>Error! Bookmark not defined.</b> |
| <i>Supplementary Figure S1.</i> Distribution of COVID-19 diagnosis site in the indicated and<br>comparator cohorts.....                                                                                                   | <b>Error! Bookmark not defined.</b> |
| <i>Supplementary Figure S2.</i> Incidence of hospitalization, ICU admission, in-hospital death,<br>and all-cause mortality in the (A) RA cohort, (B) PsA cohort, and (C) UC cohort, by<br>baseline systemic therapy ..... | <b>Error! Bookmark not defined.</b> |
| <i>Supplementary Figure S3.</i> Length of hospital stay among hospitalized patients in the<br>indicated and comparator cohorts .....                                                                                      | <b>Error! Bookmark not defined.</b> |
| <i>Supplementary Figure S4.</i> COVID-19 clinical manifestations or outcomes of interest in<br>patients with RA, by systemic therapy.....                                                                                 | <b>Error! Bookmark not defined.</b> |
| <i>Supplementary Figure S5.</i> COVID-19 clinical manifestations or outcomes of interest in<br>patients with PsA, by systemic therapy.....                                                                                | <b>Error! Bookmark not defined.</b> |
| <i>Supplementary Figure S6.</i> COVID-19 clinical manifestations/outcomes of interest in<br>patients with UC, by systemic therapy.....                                                                                    | <b>Error! Bookmark not defined.</b> |

## SUPPLEMENTARY METHODS.

### US Optum<sup>®</sup> deidentified COVID-19 electronic health record dataset (2007–2020)

Given the urgent need to clinically understand the novel virus of COVID-19, Optum developed a low latency data pipeline that enables minimal data lag, while preserving as much clinical data as possible. The data are sourced from Optum's longitudinal electronic health record (EHR) repository, which is derived from dozens of healthcare provider organizations in the US, including more than 700 hospitals and 7,000 clinics. The data are certified as deidentified by an independent statistical expert following the Health Insurance Portability and Accountability Act of 1996

(HIPAA) statistical deidentification rules and managed according to Optum<sup>®</sup> customer data use agreements. The COVID-19 dataset incorporates a wide swathe of raw clinical data, including new, unmapped COVID-19-specific clinical data points from both inpatient and ambulatory electronic medical records, practice management systems, and numerous other internal systems. Information is processed from across the continuum of care, including acute inpatient stays and outpatient visits. The COVID-19 data capture point-of-care diagnostics specific to the COVID-19 patient during initial presentation, acute illness, and convalescence, with over 500 mapped labs and bedside observations, including COVID-19-specific testing.

The Optum<sup>®</sup> COVID-19 EHR dataset elements included patient-level information: demographics, mortality (captured from Social Security Administration Death Master File, electronic medical records and Centers for Medicare and Medicaid Services), as well as clinical interventions, such as medications prescribed and administered. The data are comprised of multiple tables that can be linked by a common patient identifier (an anonymous, randomized string of characters).

The COVID-19 patient data included patients in the EHR database who had documented clinical care from January 2007 through to the most current monthly data release with a documented exposure to, or had been tested for, SARS-CoV-2 (positive or negative result), and/or had a diagnosis of COVID-19, or acute respiratory illness, after February 1, 2020. Thus, not all patients within the Optum<sup>®</sup> COVID-19 EHR dataset had received a diagnosis of COVID-19. Patients with COVID-19 were identified via a diagnosis code for SARS-CoV-2, a positive test for SARS-CoV-2 active infection (antigen and/or polymerase chain reaction), and/or a positive antibody test. The Optum<sup>®</sup> COVID-19 EHR dataset included medical records from 2007, allowing for the utilization of patients' medical history in the analysis.

## Indicated cohort inclusion

The indicated cohorts included patients who had received a clinician diagnosis of rheumatoid arthritis, psoriatic arthritis, or ulcerative colitis (via International Classification of Diseases, 10th Revision, Clinical Modification diagnosis codes) within 2 years before index date and evidence of treatment with conventional synthetic disease-modifying antirheumatic drugs (including auranofin, aurothioglucose, azathioprine, chloroquine hydrochloride, chloroquine phosphate, cyclophosphamide, cyclosporine, gold sodium thiomalate, hydroxychloroquine sulphate, leflunomide, mercaptopurine, mesalamine, methotrexate, minocycline hydrochloride, n-acetylpenicillamine, penicillamine, primaquine, sulfasalazine, tacrolimus, and thalidomide), Janus kinase inhibitors (including tofacitinib, baricitinib, and upadacitinib), tumor necrosis factor inhibitors (TNFi; including adalimumab, certolizumab pegol, etanercept, golimumab, and infliximab), or non-TNFi biologics (including sarilumab, ustekinumab, secukinumab, abatacept, tocilizumab, ixekizumab, anakinra, and rituximab), prescribed within 2 years before index date.

International Classification of Diseases, 10th Revision, Clinical Modification diagnosis code list for study endpoints and variables

|                       |                                                                      |
|-----------------------|----------------------------------------------------------------------|
| <b>Pneumonia</b>      |                                                                      |
| J12                   | Viral pneumonia, not classified elsewhere                            |
| J12.8                 | Other viral pneumonia                                                |
| J12.81                | Pneumonia due to SARS associated coronavirus                         |
| J12.89                | Other viral pneumonia                                                |
| J12.9                 | Viral pneumonia, unspecified                                         |
| J18                   | Pneumonia, unspecified organism                                      |
| J18.0                 | Bronchopneumonia, unspecified organism                               |
| J18.1                 | Lobar pneumonia, unspecified organism                                |
| J18.2                 | Hypostatic pneumonia, unspecified organism                           |
| J18.8                 | Other pneumonia, unspecified organism                                |
| J18.9                 | Pneumonia, unspecified organism                                      |
| J95.851               | Ventilator associated pneumonia                                      |
| <b>Kidney failure</b> |                                                                      |
| N00.0                 | Acute nephritic syndrome with minor glomerular abnormality           |
| N00.1                 | Acute nephritic syndrome with focal and segmental glomerular lesions |
| N00.2                 | Acute nephritic syndrome with diffuse membranous glomerulonephritis  |

|                          |                                                                                                    |
|--------------------------|----------------------------------------------------------------------------------------------------|
| N00.3                    | Acute nephritic syndrome with diffuse mesangial proliferative glomerulonephritis                   |
| N00.4                    | Acute nephritic syndrome with diffuse endocapillary proliferative glomerulonephritis               |
| N00.5                    | Acute nephritic syndrome with diffuse mesangiocapillary glomerulonephritis                         |
| N00.6                    | Acute nephritic syndrome with dense deposit disease                                                |
| N00.7                    | Acute nephritic syndrome with diffuse crescentic glomerulonephritis                                |
| N01.0                    | Rapidly progressive nephritic syndrome with minor glomerular abnormality                           |
| N01.1                    | Rapidly progressive nephritic syndrome with focal and segmental glomerular lesions                 |
| N01.2                    | Rapidly progressive nephritic syndrome with diffuse membranous glomerulonephritis                  |
| N01.3                    | Rapidly progressive nephritic syndrome with diffuse mesangial proliferative glomerulonephritis     |
| N01.4                    | Rapidly progressive nephritic syndrome with diffuse endocapillary proliferative glomerulonephritis |
| N01.5                    | Rapidly progressive nephritic syndrome with diffuse mesangiocapillary glomerulonephritis           |
| N01.6                    | Rapidly progressive nephritic syndrome with dense deposit disease                                  |
| N01.7                    | Rapidly progressive nephritic syndrome with diffuse crescentic glomerulonephritis                  |
| N01.8                    | Rapidly progressive nephritic syndrome with other morphologic changes                              |
| N01.9                    | Rapidly progressive nephritic syndrome with unspecified morphologic changes                        |
| N08                      | Glomerular disorders in diseases classified elsewhere                                              |
| N00.8                    | Acute nephritic syndrome with other morphologic changes                                            |
| N00.9                    | Acute nephritic syndrome with unspecified morphologic changes                                      |
| N17                      | Acute kidney failure                                                                               |
| N17.1                    | Acute kidney failure with acute cortical necrosis                                                  |
| N17.2                    | Acute kidney failure with medullary necrosis                                                       |
| N17.0                    | Acute kidney failure with tubular necrosis                                                         |
| N17.9                    | Acute kidney failure, unspecified                                                                  |
| N17.8                    | Other acute kidney failure                                                                         |
| N18.6                    | End stage renal disease                                                                            |
| N19                      | Unspecified kidney failure                                                                         |
| N26.1                    | Atrophy of kidney (terminal)                                                                       |
| N26.9                    | Renal sclerosis, unspecified                                                                       |
| <b>Thrombotic events</b> |                                                                                                    |
| I80.x                    | Phlebitis and thrombophlebitis                                                                     |
| I81.x                    | Portal vein thrombosis                                                                             |
| I82.x                    | Other venous embolism and thrombosis                                                               |
| I26                      | Pulmonary embolism                                                                                 |
| D65                      | Disseminated intravascular coagulation-coagulopathy                                                |
| I60.x                    | Subarachnoid hemorrhage                                                                            |
| I61.x                    | Intracerebral hemorrhage                                                                           |
| I63.x                    | Cerebral infarction                                                                                |

|                                                   |                                                                                                                                                           |
|---------------------------------------------------|-----------------------------------------------------------------------------------------------------------------------------------------------------------|
| I64.x                                             | Stroke, not specified as hemorrhage or infarction                                                                                                         |
| H34.1                                             | Central retina artery occlusion                                                                                                                           |
| G45.x                                             | Transient cerebral ischemic attacks and related syndromes                                                                                                 |
| <b>Acute respiratory distress syndrome (ARDS)</b> |                                                                                                                                                           |
| J80                                               | Acute respiratory distress syndrome (ARDS)                                                                                                                |
| J96                                               | Respiratory failure, not elsewhere classified                                                                                                             |
| J96.00                                            | Acute respiratory failure                                                                                                                                 |
| J96.00                                            | ..... unspecified whether with hypoxia or hypercapnia                                                                                                     |
| J96.01                                            | ..... with hypoxia                                                                                                                                        |
| J96.2                                             | Acute and chronic respiratory failure                                                                                                                     |
| J96.20                                            | ..... unspecified whether with hypoxia or hypercapnia                                                                                                     |
| J96.21                                            | ..... with hypoxia                                                                                                                                        |
| J96.9                                             | Respiratory failure, unspecified                                                                                                                          |
| J96.90                                            | ..... unspecified whether with hypoxia or hypercapnia                                                                                                     |
| J96.91                                            | ..... with hypoxia                                                                                                                                        |
| J8417                                             | Other interstitial pulmonary diseases with fibrosis in diseases classified elsewhere                                                                      |
| J8489                                             | Other specified interstitial pulmonary diseases                                                                                                           |
| J9600                                             | Acute respiratory failure, unspecified whether with hypoxia or hypercapnia                                                                                |
| J9601                                             | Acute respiratory failure with hypoxia                                                                                                                    |
| J9690                                             | Respiratory failure, unspecified, unspecified whether with hypoxia or hypercapnia                                                                         |
| J9691                                             | Respiratory failure, unspecified with hypoxia                                                                                                             |
| J80                                               | Acute respiratory distress syndrome (ARDS)                                                                                                                |
| S27.309A                                          | Acute lung injury                                                                                                                                         |
| <b>Heart failure</b>                              |                                                                                                                                                           |
| I0981                                             | Rheumatic heart failure                                                                                                                                   |
| I130                                              | Hypertensive heart and chronic kidney disease with heart failure and stage 1 through stage 4 chronic kidney disease or unspecified chronic kidney disease |
| I132                                              | Hypertensive heart and chronic kidney disease with heart failure and with stage 5 chronic kidney disease or end stage renal disease                       |
| I5020                                             | Unspecified systolic (congestive) heart failure                                                                                                           |
| I5021                                             | Acute systolic (congestive) heart failure                                                                                                                 |
| I5022                                             | Chronic systolic (congestive) heart failure                                                                                                               |
| I5023                                             | Acute on chronic systolic (congestive) heart failure                                                                                                      |
| I5030                                             | Unspecified diastolic (congestive) heart failure                                                                                                          |
| I5031                                             | Acute diastolic (congestive) heart failure                                                                                                                |
| I5032                                             | Chronic diastolic (congestive) heart failure                                                                                                              |
| I5033                                             | Acute or chronic diastolic (congestive) heart failure                                                                                                     |
| I5040                                             | Unspecified combined systolic (congestive) and diastolic (congestive) heart failure                                                                       |
| I5041                                             | Acute combined systolic (congestive) and diastolic (congestive) heart failure                                                                             |
| I5042                                             | Chronic combined systolic (congestive) and diastolic (congestive) heart failure                                                                           |

|                                       |                                                                                                                                                                                  |
|---------------------------------------|----------------------------------------------------------------------------------------------------------------------------------------------------------------------------------|
| I5043                                 | Acute on chronic combined systolic (congestive) and diastolic (congestive) heart failure                                                                                         |
| I509                                  | Heart failure, unspecified                                                                                                                                                       |
| I501                                  | Left ventricular failure                                                                                                                                                         |
| <b>Sepsis or septic shock</b>         |                                                                                                                                                                                  |
| A41.89                                | Other specified sepsis                                                                                                                                                           |
| A41.9                                 | Sepsis unspecified organism                                                                                                                                                      |
| R65.10                                | Systemic inflammatory response syndrome (SIRS) of non-infectious origin without acute organ dysfunction                                                                          |
| R65.11                                | SIRS of non-infectious origin with acute organ dysfunction                                                                                                                       |
| R65.20                                | Severe sepsis without septic shock                                                                                                                                               |
| R65.21                                | Severe sepsis with septic shock                                                                                                                                                  |
| <b>Mechanical ventilation or ECMO</b> |                                                                                                                                                                                  |
| 1015098*                              | Ventilator Management                                                                                                                                                            |
| 1014859*                              | Ventilation assist and management, initiation of pressure or volume preset ventilators for assisted or controlled breathing                                                      |
| 94003*                                | Ventilation assist and management, initiation of pressure or volume preset ventilators for assisted or controlled breathing; hospital inpatient/observation, each subsequent day |
| 94002*                                | Ventilation assist and management, initiation of pressure or volume preset ventilators for assisted or controlled breathing; hospital inpatient/observation, initial day         |
| E0454†                                | Pressure ventilator                                                                                                                                                              |
| 94656*                                | Ventilation assist and management, initiation of pressure or volume preset ventilators for assisted or controlled breathing; first day                                           |
| 94657*                                | Ventilation assist and management, initiation of pressure or volume preset ventilators for assisted or controlled breathing; first day controlled breathing; subsequent days     |
| E0450†                                | Volume control ventilator, without pressure support mode, may include pressure control mode, used with invasive interface (e.g. tracheostomy tube)                               |
| 5A0945Z                               | Assistance with Respiratory Ventilation, 24-96 Consecutive Hours                                                                                                                 |
| 5A09457                               | Assistance with Respiratory Ventilation, 24-96 Consecutive Hours, Continuous Positive Airway Pressure                                                                            |
| 5A09458                               | Assistance with Respiratory Ventilation, 24-96 Consecutive Hours, Intermittent Positive Airway Pressure                                                                          |
| 5A0955Z                               | Assistance with Respiratory Ventilation, Greater than 96 Consecutive Hours                                                                                                       |
| 5A09557                               | Assistance with Respiratory Ventilation, Greater than 96 Consecutive Hours, Continuous Positive Airway Pressure                                                                  |
| 5A09558                               | Assistance with Respiratory Ventilation, Greater than 96 Consecutive Hours, Intermittent Positive Airway Pressure                                                                |
| 5A0935Z                               | Assistance with Respiratory Ventilation, Less than 24 Consecutive Hours                                                                                                          |
| 5A09357                               | Assistance with Respiratory Ventilation, Less than 24 Consecutive Hours, Continuous Positive Airway Pressure                                                                     |
| 5A09358                               | Assistance with Respiratory Ventilation, Less than 24 Consecutive Hours, Intermittent Positive Airway Pressure                                                                   |
| 5A1935Z                               | Respiratory Ventilation, Less than 24 Consecutive Hours                                                                                                                          |
| 5A1945Z                               | Respiratory Ventilation, 24-96 Consecutive Hours                                                                                                                                 |
| 5A1955Z                               | Respiratory Ventilation, Greater than 96 Consecutive Hours                                                                                                                       |
| 5A19054                               | Assistance with Respiratory Ventilation, 24-96 Consecutive Hours                                                                                                                 |

|                                                       |                                                                                                                                |
|-------------------------------------------------------|--------------------------------------------------------------------------------------------------------------------------------|
| 0BH13EZ                                               | Insertion of Endotracheal Airway into Trachea, Percutaneous Approach                                                           |
| 0BH17EZ                                               | Insertion of Endotracheal Airway into Trachea, Via Natural or Artificial Opening                                               |
| 0BH18EZ                                               | Insertion of Endotracheal Airway into Trachea, Via Natural or Artificial Opening Endoscopic                                    |
| 5A1522F <sup>†</sup>                                  | Extracorporeal Oxygenation, Membrane, Central                                                                                  |
| 5A1522G <sup>†</sup>                                  | Extracorporeal Oxygenation, Membrane, Peripheral Venous-arterial                                                               |
| 5A1522H <sup>†</sup>                                  | Extracorporeal Oxygenation, Membrane, Peripheral Venous-venous                                                                 |
| 3 <sup>§</sup>                                        | ECMO or Tracheostomy with Mechanical Ventilation > 96 Hours or Principal Diagnosis Except Face, Mouth and Neck with Major O.R. |
| 207 <sup>§</sup>                                      | Respiratory System Diagnosis with Ventilator Support > 96 Hours or Peripheral Extracorporeal Membrane Oxygenation (ECMO)       |
| 291 <sup>§</sup>                                      | Heart Failure and Shock with MCC or Peripheral Extracorporeal Membrane Oxygenation (ECMO)                                      |
| 296 <sup>§</sup>                                      | Cardiac Arrest, Unexplained with MCC or Peripheral Extracorporeal Membrane Oxygenation (ECMO)                                  |
| 870 <sup>§</sup>                                      | Septicemia or Severe Sepsis with Mechanical Ventilation > 96 Hours or Peripheral Extracorporeal Membrane Oxygenation (ECMO)    |
| <b>Intravenous immunoglobulin<sup>‡</sup></b>         |                                                                                                                                |
| Y59.3 or Y593                                         | Adverse effects in the therapeutic use of immunoglobulin                                                                       |
| Y59.300 or Y59300                                     | Adverse effects in the therapeutic use of immunoglobulin                                                                       |
| J1573 <sup>†</sup>                                    | Hepatitis B immune globulin                                                                                                    |
| J1557, J1566, J1568, J1572, J1599, J1459 <sup>†</sup> | Immune globulin                                                                                                                |
| J2792 <sup>†</sup>                                    | Rho d immune globulin                                                                                                          |
| G8809 <sup>†</sup>                                    | Rh-immunoglobulin (RhoGAM) ordered                                                                                             |
| G0332 <sup>†</sup>                                    | Services for intravenous infusion of immunoglobulin prior to administration                                                    |
| 82784 <sup>*</sup>                                    | Gammaglobulin (immunoglobulin); IgA, IgD, IgG, IgM, each                                                                       |
| 82785 <sup>*</sup>                                    | Gammaglobulin (immunoglobulin); IgE                                                                                            |
| 82787 <sup>*</sup>                                    | Gammaglobulin (immunoglobulin); immunoglobulin subclasses (e.g. IgG1, 2, 3 or 4), each                                         |

CPT: current procedural terminology; DRG: diagnosis-related group; HCPCS: Healthcare Common Procedure Coding System;

NDC: National Drug Code.

\*CPT code.

<sup>†</sup>HCPCS code.

<sup>‡</sup>Patients with NDC for BabyBIG, Bivigam, Carimune, Cytogam, Cytomegalovirus Immune Globulin, Flebogamma, Gamimune N 10%, Gamimune N 5%, Gammagard S/D, Gammaplex, Gammar I.V., Gammar-P I.V., Gamunex, Iveegam, Octagam, Panglobulin, Panzyga, Polygam S/D, Privigen, Respigam, Sandoglobulin, Venoglobulin-S 10%, Venoglobulin-S 5%, or Zinplava.

<sup>§</sup>DRG code.

**Supplementary Figure 2. Incidence of hospitalization, ICU admission, in-hospital death, and all-cause mortality in the (A) RA cohort, (B) PsA cohort, and (C) UC cohort, by baseline systemic therapy.**

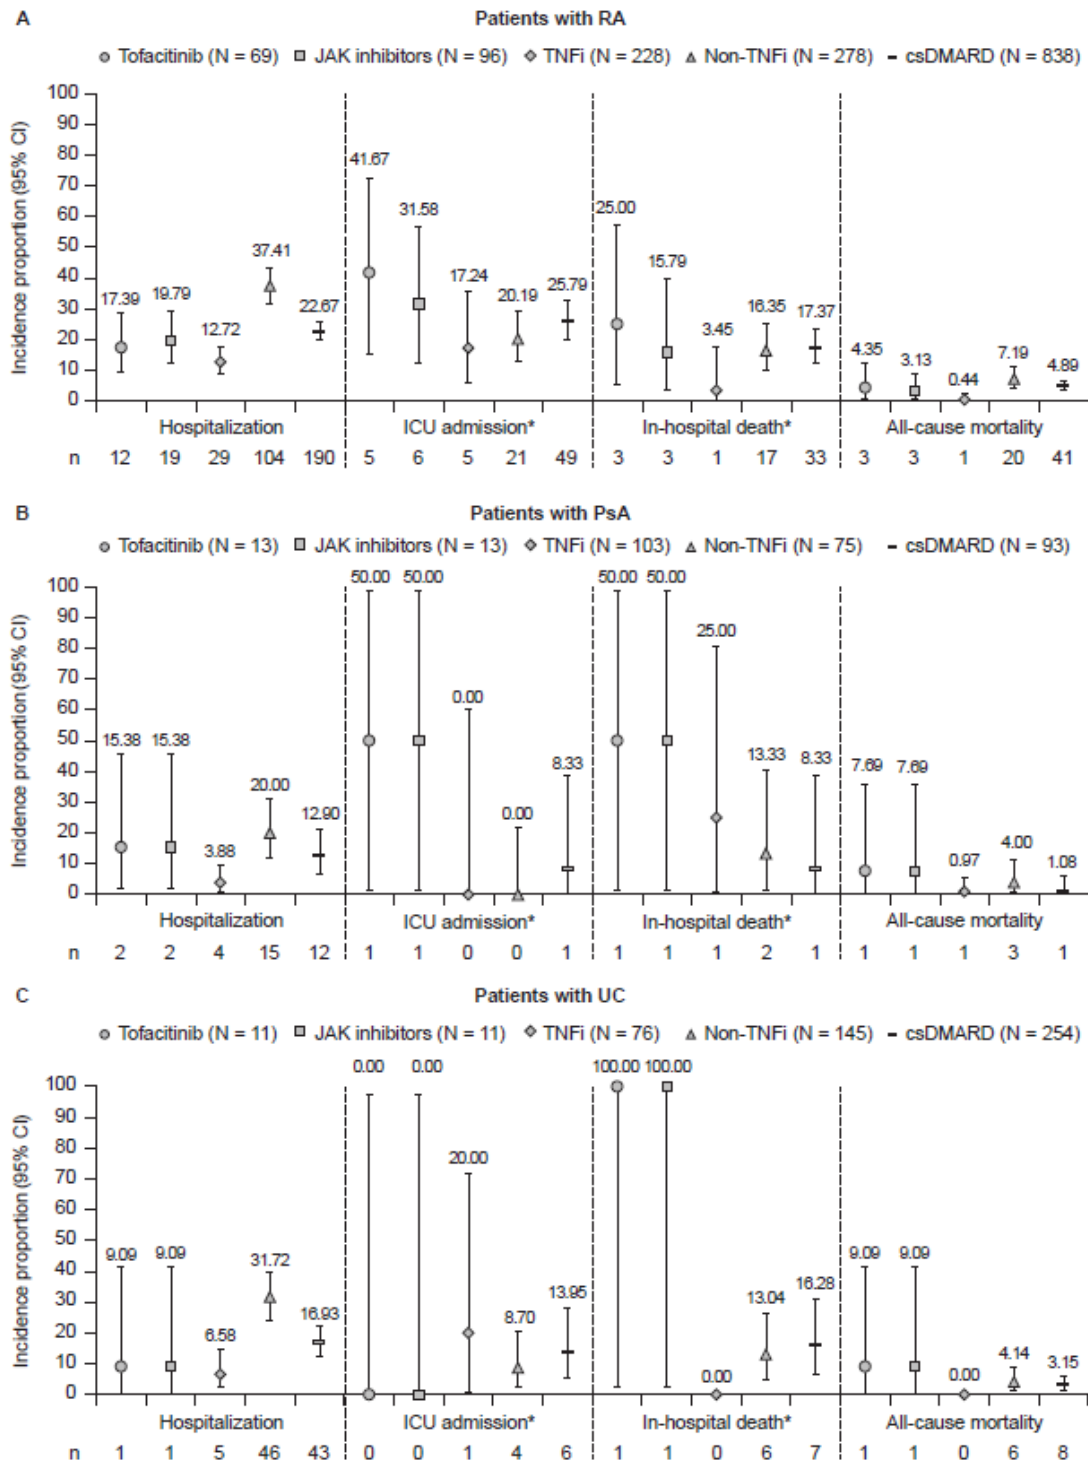

95% CIs are not calculated for incidence proportions of 0.00. CI: confidence interval; csDMARD: conventional synthetic disease-modifying antirheumatic drug; ICU: intensive care unit; JAK: Janus kinase; N: number of patients in



the cohort; n: number of patients in the specified category; PsA: psoriatic arthritis; RA: rheumatoid arthritis; TNFi: tumor necrosis factor inhibitor; UC: ulcerative colitis. \*Denominator is the number of patients hospitalized.

**Supplementary Table 1. Baseline\* demographics and characteristics of patients in the indicated cohorts by systemic therapy.**

|                                       | RA cohort                            |                                |                                                |                                   | PsA cohort                            |                                |                                               |                                  | UC cohort                             |                               |                                                |                                   |
|---------------------------------------|--------------------------------------|--------------------------------|------------------------------------------------|-----------------------------------|---------------------------------------|--------------------------------|-----------------------------------------------|----------------------------------|---------------------------------------|-------------------------------|------------------------------------------------|-----------------------------------|
|                                       | Tofacitinib <sup>†</sup><br>(N = 69) | TNFi <sup>‡</sup><br>(N = 228) | Non-TNFi<br>biologic <sup>§</sup><br>(N = 278) | csDMARD <sup>¶</sup><br>(N = 838) | Tofacitinib <sup>**</sup><br>(N = 13) | TNFi <sup>‡</sup><br>(N = 103) | Non-TNFi<br>biologic <sup>§</sup><br>(N = 75) | csDMARD <sup>¶</sup><br>(N = 93) | Tofacitinib <sup>**</sup><br>(N = 11) | TNFi <sup>‡</sup><br>(N = 76) | Non-TNFi<br>biologic <sup>§</sup><br>(N = 145) | csDMARD <sup>¶</sup><br>(N = 254) |
| <b>Age, years,<br/>median (range)</b> | 60.00 (21–87)                        | 53.5 (19–84)                   | 63.0 (19–89)                                   | 61.0 (19–89)                      | 57.0 (32–74)                          | 51.0 (22–88)                   | 55.0 (24–84)                                  | 56.0 (31–89)                     | 50.0 (25–70)                          | 38.5 (18–77)                  | 54.0 (18–89)                                   | 51.5 (18–89)                      |
| <b>Age, n (%)</b>                     |                                      |                                |                                                |                                   |                                       |                                |                                               |                                  |                                       |                               |                                                |                                   |
| ≥ 18–55                               | 26 (37.7)                            | 123 (54.0)                     | 76 (27.3)                                      | 271 (32.3)                        | 6 (46.2)                              | 71 (68.9)                      | 38 (50.7)                                     | 46 (49.5)                        | 8 (72.7)                              | 57 (75.0)                     | 78 (53.8)                                      | 141 (55.5)                        |
| 56–65                                 | 24 (34.8)                            | 53 (23.3)                      | 85 (30.6)                                      | 254 (30.3)                        | 4 (30.8)                              | 21 (20.4)                      | 23 (30.7)                                     | 25 (26.9)                        | 2 (18.2)                              | 12 (15.8)                     | 27 (18.6)                                      | 55 (21.7)                         |
| 66–75                                 | 14 (20.3)                            | 36 (15.8)                      | 66 (23.7)                                      | 167 (19.9)                        | 3 (23.1)                              | 10 (9.7)                       | 9 (12.0)                                      | 13 (14.0)                        | 1 (9.1)                               | 6 (7.9)                       | 20 (13.8)                                      | 27 (10.6)                         |
| > 76                                  | 5 (7.3)                              | 16 (7.0)                       | 51 (18.4)                                      | 146 (17.4)                        | 0 (0.0)                               | 1 (1.0)                        | 5 (6.7)                                       | 9 (9.7)                          | 0 (0.0)                               | 1 (1.3)                       | 20 (13.8)                                      | 31 (12.2)                         |
| <b>Sex (female),<br/>n (%)</b>        | 58 (84.1)                            | 188 (82.5)                     | 214 (77.0)                                     | 652 (77.8)                        | 9 (69.2)                              | 57 (55.3)                      | 31 (41.3)                                     | 59 (63.4)                        | 8 (72.7)                              | 41 (54.0)                     | 75 (51.7)                                      | 135 (53.2)                        |
| <b>Race, n (%)</b>                    |                                      |                                |                                                |                                   |                                       |                                |                                               |                                  |                                       |                               |                                                |                                   |

|                                      | RA cohort                            |                                |                                                |                                   | PsA cohort                            |                                |                                               |                                  | UC cohort                             |                               |                                                |                                   |
|--------------------------------------|--------------------------------------|--------------------------------|------------------------------------------------|-----------------------------------|---------------------------------------|--------------------------------|-----------------------------------------------|----------------------------------|---------------------------------------|-------------------------------|------------------------------------------------|-----------------------------------|
|                                      | Tofacitinib <sup>†</sup><br>(N = 69) | TNFi <sup>‡</sup><br>(N = 228) | Non-TNFi<br>biologic <sup>§</sup><br>(N = 278) | csDMARD <sup>¶</sup><br>(N = 838) | Tofacitinib <sup>**</sup><br>(N = 13) | TNFi <sup>‡</sup><br>(N = 103) | Non-TNFi<br>biologic <sup>§</sup><br>(N = 75) | csDMARD <sup>¶</sup><br>(N = 93) | Tofacitinib <sup>**</sup><br>(N = 11) | TNFi <sup>‡</sup><br>(N = 76) | Non-TNFi<br>biologic <sup>§</sup><br>(N = 145) | csDMARD <sup>¶</sup><br>(N = 254) |
| White                                | 47 (68.1)                            | 163 (71.5)                     | 191 (68.7)                                     | 577 (68.9)                        | 10 (76.9)                             | 87 (84.5)                      | 67 (89.3)                                     | 81 (87.1)                        | 8 (72.7)                              | 61 (80.3)                     | 114 (78.6)                                     | 207 (81.5)                        |
| Black or African<br>American         | 10 (14.5)                            | 28 (12.3)                      | 49 (17.6)                                      | 148 (17.7)                        | 0 (0.0)                               | 3 (2.9)                        | 1 (1.3)                                       | 5 (5.4)                          | 2 (18.2)                              | 10 (13.2)                     | 12 (8.3)                                       | 21 (8.3)                          |
| Asian                                | 5 (7.3)                              | 4 (1.8)                        | 3 (1.1)                                        | 16 (1.9)                          | 0 (0.0)                               | 1 (1.0)                        | 2 (2.7)                                       | 2 (2.2)                          | 0 (0.0)                               | 1 (1.3)                       | 2 (1.4)                                        | 8 (3.2)                           |
| Other/Unknown                        | 7 (10.1)                             | 33 (14.5)                      | 35 (12.6)                                      | 97 (11.6)                         | 3 (23.1)                              | 12 (11.7)                      | 5 (6.7)                                       | 5 (5.4)                          | 1 (9.1)                               | 4 (5.3)                       | 17 (11.7)                                      | 18 (7.1)                          |
| <b>US region, n (%)</b>              |                                      |                                |                                                |                                   |                                       |                                |                                               |                                  |                                       |                               |                                                |                                   |
| Midwest                              | 29 (42.0)                            | 90 (39.5)                      | 79 (28.4)                                      | 411 (49.1)                        | 2 (15.4)                              | 41 (39.8)                      | 20 (26.7)                                     | 45 (48.4)                        | 5 (45.5)                              | 46 (60.5)                     | 54 (37.2)                                      | 125 (49.2)                        |
| Northeast                            | 32 (46.4)                            | 95 (41.7)                      | 129 (46.4)                                     | 249 (29.7)                        | 8 (61.5)                              | 54 (52.4)                      | 50 (66.7)                                     | 34 (36.6)                        | 6 (54.6)                              | 22 (29.0)                     | 73 (50.3)                                      | 79 (31.1)                         |
| South                                | 7 (10.1)                             | 22 (9.7)                       | 20 (7.2)                                       | 112 (13.4)                        | 3 (23.1)                              | 4 (3.9)                        | 3 (4.0)                                       | 9 (9.7)                          | 0 (0.0)                               | 4 (5.3)                       | 1 (0.7)                                        | 30 (11.8)                         |
| West                                 | 0 (0.0)                              | 16 (7.0)                       | 43 (15.5)                                      | 50 (6.0)                          | 0 (0.0)                               | 3 (2.9)                        | 1 (1.3)                                       | 2 (2.2)                          | 0 (0.0)                               | 3 (4.0)                       | 14 (9.7)                                       | 13 (5.1)                          |
| Unknown                              | 1 (1.5)                              | 5 (2.2)                        | 7 (2.5)                                        | 16 (1.9)                          | 0 (0.0)                               | 1 (1.0)                        | 1 (1.3)                                       | 3 (3.2)                          | 0 (0.0)                               | 1 (1.3)                       | 3 (2.1)                                        | 7 (2.8)                           |
| <b>Insurance, n (%)<sup>††</sup></b> |                                      |                                |                                                |                                   |                                       |                                |                                               |                                  |                                       |                               |                                                |                                   |

|                                             | RA cohort                            |                                |                                                |                                   | PsA cohort                            |                                |                                               |                                  | UC cohort                             |                               |                                                |                                   |
|---------------------------------------------|--------------------------------------|--------------------------------|------------------------------------------------|-----------------------------------|---------------------------------------|--------------------------------|-----------------------------------------------|----------------------------------|---------------------------------------|-------------------------------|------------------------------------------------|-----------------------------------|
|                                             | Tofacitinib <sup>†</sup><br>(N = 69) | TNFi <sup>‡</sup><br>(N = 228) | Non-TNFi<br>biologic <sup>§</sup><br>(N = 278) | csDMARD <sup>¶</sup><br>(N = 838) | Tofacitinib <sup>**</sup><br>(N = 13) | TNFi <sup>‡</sup><br>(N = 103) | Non-TNFi<br>biologic <sup>§</sup><br>(N = 75) | csDMARD <sup>¶</sup><br>(N = 93) | Tofacitinib <sup>**</sup><br>(N = 11) | TNFi <sup>‡</sup><br>(N = 76) | Non-TNFi<br>biologic <sup>§</sup><br>(N = 145) | csDMARD <sup>¶</sup><br>(N = 254) |
| Commercial                                  | 51 (73.9)                            | 175 (76.8)                     | 186 (66.9)                                     | 601 (71.7)                        | 10 (76.9)                             | 75 (72.8)                      | 52 (69.3)                                     | 70 (75.3)                        | 9 (81.8)                              | 61 (80.3)                     | 112 (77.2)                                     | 189 (74.4)                        |
| Medicaid                                    | 9 (13.0)                             | 43 (18.9)                      | 45 (16.2)                                      | 141 (16.8)                        | 1 (7.7)                               | 9 (8.7)                        | 13 (17.3)                                     | 8 (8.6)                          | 2 (18.2)                              | 12 (15.8)                     | 27 (18.6)                                      | 34 (13.4)                         |
| Medicare                                    | 18 (26.1)                            | 69 (30.3)                      | 154 (55.4)                                     | 382 (45.6)                        | 1 (7.7)                               | 13 (12.6)                      | 14 (18.7)                                     | 23 (24.7)                        | 2 (18.2)                              | 6 (7.9)                       | 51 (35.2)                                      | 68 (26.8)                         |
| Other payor type                            | 5 (7.3)                              | 30 (13.2)                      | 52 (18.7)                                      | 166 (19.8)                        | 3 (23.1)                              | 17 (16.5)                      | 7 (9.3)                                       | 17 (18.3)                        | 2 (18.2)                              | 9 (11.8)                      | 24 (16.6)                                      | 25 (9.8)                          |
| Uninsured                                   | 1 (1.5)                              | 4 (1.8)                        | 27 (9.7)                                       | 84 (10.0)                         | 2 (15.4)                              | 6 (5.8)                        | 6 (8.0)                                       | 8 (8.6)                          | 0 (0.0)                               | 7 (9.2)                       | 18 (12.4)                                      | 20 (7.9)                          |
| Unknown                                     | 56 (81.2)                            | 171 (75.0)                     | 218 (78.4)                                     | 578 (69.0)                        | 10 (76.9)                             | 76 (73.8)                      | 57 (76.0)                                     | 66 (71.0)                        | 6 (54.6)                              | 60 (79.0)                     | 124 (85.5)                                     | 172 (67.7)                        |
| <b>Comorbidities/medical history, n (%)</b> |                                      |                                |                                                |                                   |                                       |                                |                                               |                                  |                                       |                               |                                                |                                   |
| ILD                                         | 3 (4.4)                              | 7 (3.1)                        | 20 (7.2)                                       | 35 (4.2)                          | 0 (0.0)                               | 0 (0.0)                        | 1 (1.3)                                       | 1 (1.1)                          | 0 (0.0)                               | 1 (1.3)                       | 6 (4.1)                                        | 6 (2.4)                           |
| Asthma                                      | 10 (14.5)                            | 21 (9.2)                       | 45 (16.2)                                      | 113 (13.5)                        | 2 (15.4)                              | 8 (7.8)                        | 8 (10.7)                                      | 9 (9.7)                          | 1 (9.1)                               | 5 (6.6)                       | 17 (11.7)                                      | 16 (6.3)                          |
| COPD                                        | 6 (8.7)                              | 21 (9.2)                       | 63 (22.7)                                      | 100 (11.9)                        | 0 (0.0)                               | 1 (1.0)                        | 4 (5.3)                                       | 6 (6.5)                          | 0 (0.0)                               | 1 (1.3)                       | 10 (6.9)                                       | 15 (5.9)                          |
| VTE                                         | 0 (0.0)                              | 3 (1.3)                        | 23 (8.3)                                       | 33 (3.9)                          | 0 (0.0)                               | 0 (0.0)                        | 4 (5.3)                                       | 2 (2.2)                          | 0 (0.0)                               | 0 (0.0)                       | 6 (4.1)                                        | 8 (3.2)                           |
| Hypertension                                | 23 (33.3)                            | 82 (36.0)                      | 159 (57.2)                                     | 425 (50.7)                        | 6 (46.2)                              | 25 (24.3)                      | 29 (38.7)                                     | 40 (43.0)                        | 1 (9.1)                               | 13 (17.1)                     | 54 (37.2)                                      | 84 (33.1)                         |

|                                   | RA cohort                            |                                |                                                |                                   | PsA cohort                            |                                |                                               |                                  | UC cohort                             |                               |                                                |                                   |
|-----------------------------------|--------------------------------------|--------------------------------|------------------------------------------------|-----------------------------------|---------------------------------------|--------------------------------|-----------------------------------------------|----------------------------------|---------------------------------------|-------------------------------|------------------------------------------------|-----------------------------------|
|                                   | Tofacitinib <sup>†</sup><br>(N = 69) | TNFi <sup>‡</sup><br>(N = 228) | Non-TNFi<br>biologic <sup>§</sup><br>(N = 278) | csDMARD <sup>¶</sup><br>(N = 838) | Tofacitinib <sup>**</sup><br>(N = 13) | TNFi <sup>‡</sup><br>(N = 103) | Non-TNFi<br>biologic <sup>§</sup><br>(N = 75) | csDMARD <sup>¶</sup><br>(N = 93) | Tofacitinib <sup>**</sup><br>(N = 11) | TNFi <sup>‡</sup><br>(N = 76) | Non-TNFi<br>biologic <sup>§</sup><br>(N = 145) | csDMARD <sup>¶</sup><br>(N = 254) |
| Hyperlipidemia                    | 20 (29.0)                            | 60 (26.3)                      | 130 (46.8)                                     | 313 (37.4)                        | 4 (30.8)                              | 21 (20.4)                      | 25 (33.3)                                     | 31 (33.3)                        | 1 (9.1)                               | 12 (15.8)                     | 38 (26.2)                                      | 67 (26.4)                         |
| Coronary artery disease           | 5 (7.3)                              | 12 (5.3)                       | 70 (25.2)                                      | 136 (16.2)                        | 2 (15.4)                              | 2 (1.9)                        | 10 (13.3)                                     | 11 (11.8)                        | 0 (0.0)                               | 1 (1.3)                       | 30 (20.7)                                      | 21 (8.3)                          |
| Serious infections (hospitalized) | 3 (4.4)                              | 6 (2.6)                        | 69 (24.8)                                      | 78 (9.3)                          | 0 (0.0)                               | 1 (1.0)                        | 7 (9.3)                                       | 3 (3.2)                          | 1 (9.1)                               | 3 (4.0)                       | 38 (26.2)                                      | 24 (9.5)                          |
| Cancer                            | 3 (4.4)                              | 6 (2.6)                        | 34 (12.2)                                      | 56 (6.7)                          | 2 (15.4)                              | 3 (2.9)                        | 2 (2.7)                                       | 3 (3.2)                          | 0 (0.0)                               | 0 (0.0)                       | 19 (13.1)                                      | 21 (8.3)                          |
| Other immune deficiencies         | 3 (4.4)                              | 10 (4.4)                       | 23 (8.3)                                       | 47 (5.6)                          | 0 (0.0)                               | 1 (1.0)                        | 2 (2.7)                                       | 2 (2.2)                          | 0 (0.0)                               | 4 (5.3)                       | 8 (5.5)                                        | 12 (4.7)                          |
| HIV/AIDS                          | 0 (0.0)                              | 0 (0.0)                        | 1 (0.4)                                        | 1 (0.1)                           | 0 (0.0)                               | 0 (0.0)                        | 0 (0.0)                                       | 0 (0.0)                          | 0 (0.0)                               | 0 (0.0)                       | 3 (2.1)                                        | 0 (0.0)                           |
| Diabetes                          | 10 (14.5)                            | 38 (16.7)                      | 67 (24.1)                                      | 177 (21.1)                        | 3 (23.1)                              | 16 (15.5)                      | 15 (20.0)                                     | 20 (21.5)                        | 2 (18.2)                              | 5 (6.6)                       | 26 (17.9)                                      | 34 (13.4)                         |
| CKD/dialysis                      | 7 (10.1)                             | 20 (8.8)                       | 60 (21.6)                                      | 131 (15.6)                        | 0 (0.0)                               | 6 (5.8)                        | 9 (12.0)                                      | 9 (9.7)                          | 1 (9.1)                               | 0 (0.0)                       | 36 (24.8)                                      | 29 (11.4)                         |

|                                             | RA cohort                            |                                |                                                |                                   | PsA cohort                            |                                |                                               |                                  | UC cohort                             |                               |                                                |                                   |
|---------------------------------------------|--------------------------------------|--------------------------------|------------------------------------------------|-----------------------------------|---------------------------------------|--------------------------------|-----------------------------------------------|----------------------------------|---------------------------------------|-------------------------------|------------------------------------------------|-----------------------------------|
|                                             | Tofacitinib <sup>†</sup><br>(N = 69) | TNFi <sup>‡</sup><br>(N = 228) | Non-TNFi<br>biologic <sup>§</sup><br>(N = 278) | csDMARD <sup>¶</sup><br>(N = 838) | Tofacitinib <sup>**</sup><br>(N = 13) | TNFi <sup>‡</sup><br>(N = 103) | Non-TNFi<br>biologic <sup>§</sup><br>(N = 75) | csDMARD <sup>¶</sup><br>(N = 93) | Tofacitinib <sup>**</sup><br>(N = 11) | TNFi <sup>‡</sup><br>(N = 76) | Non-TNFi<br>biologic <sup>§</sup><br>(N = 145) | csDMARD <sup>¶</sup><br>(N = 254) |
| Liver disease                               | 0 (0.0)                              | 14 (6.1)                       | 19 (6.8)                                       | 43 (5.1)                          | 0 (0.0)                               | 2 (1.9)                        | 8 (10.7)                                      | 2 (2.2)                          | 0 (0.0)                               | 2 (2.6)                       | 17 (11.7)                                      | 16 (6.3)                          |
| Corticosteroid<br>use <sup>‡‡</sup>         | 28 (40.6)                            | 88 (38.6)                      | 143 (51.4)                                     | 296 (35.3)                        | 2 (15.4)                              | 21 (20.4)                      | 19 (25.3)                                     | 15 (16.1)                        | 1 (9.1)                               | 33 (43.4)                     | 65 (44.8)                                      | 59 (23.2)                         |
| History of<br>hospitalization <sup>§§</sup> | 4 (5.8)                              | 23 (10.1)                      | 119 (42.8)                                     | 154 (18.4)                        | 0 (0.0)                               | 3 (2.9)                        | 14 (18.7)                                     | 12 (12.9)                        | 2 (18.2)                              | 8 (10.5)                      | 63 (43.5)                                      | 47 (18.5)                         |

AIDS: acquired immunodeficiency syndrome; CKD: chronic kidney disease; COPD: chronic obstructive pulmonary disease; csDMARD: conventional synthetic disease-modifying antirheumatic drug; HIV: human immunodeficiency virus; ILD: interstitial lung disease; N: number of patients in the cohort; n: number of patients in the specified category; PsA: psoriatic arthritis; RA: rheumatoid arthritis; TNFi: tumor necrosis factor inhibitor; UC: ulcerative colitis; VTE: venous thromboembolism.

\*Baseline was defined as within 6 months before the COVID-19 diagnosis date.

<sup>†</sup>69/96 patients prescribed JAK inhibitors were prescribed tofacitinib.

<sup>‡</sup>TNFi included adalimumab, certolizumab pegol, etanercept, golimumab, and infliximab.

<sup>§</sup>Non-TNFi biologics included sarilumab, ustekinumab, secukinumab, abatacept, tocilizumab, ixekizumab, and rituximab.

<sup>¶</sup>csDMARDs included auranofin, aurothioglucose, azathioprine, chloroquine hydrochloride, chloroquine phosphate, cyclophosphamide, cyclosporine, gold sodium thiomalate,

hydroxychloroquine sulphate, leflunomide, mercaptopurine, mesalamine, methotrexate, minocycline hydrochloride, n-acetylpenicillamine, penicillamine, primaquine, sulfasalazine, tacrolimus, and thalidomide.

\*\*All patients prescribed JAK inhibitors were prescribed tofacitinib.

††May not be mutually exclusive for each insurance type.

‡‡Within 90 days before COVID-19 diagnosis date.

§§Any hospitalization during the baseline period.

Supplementary Figure S1. Distribution of COVID-19 diagnosis site in the indicated and comparator cohorts

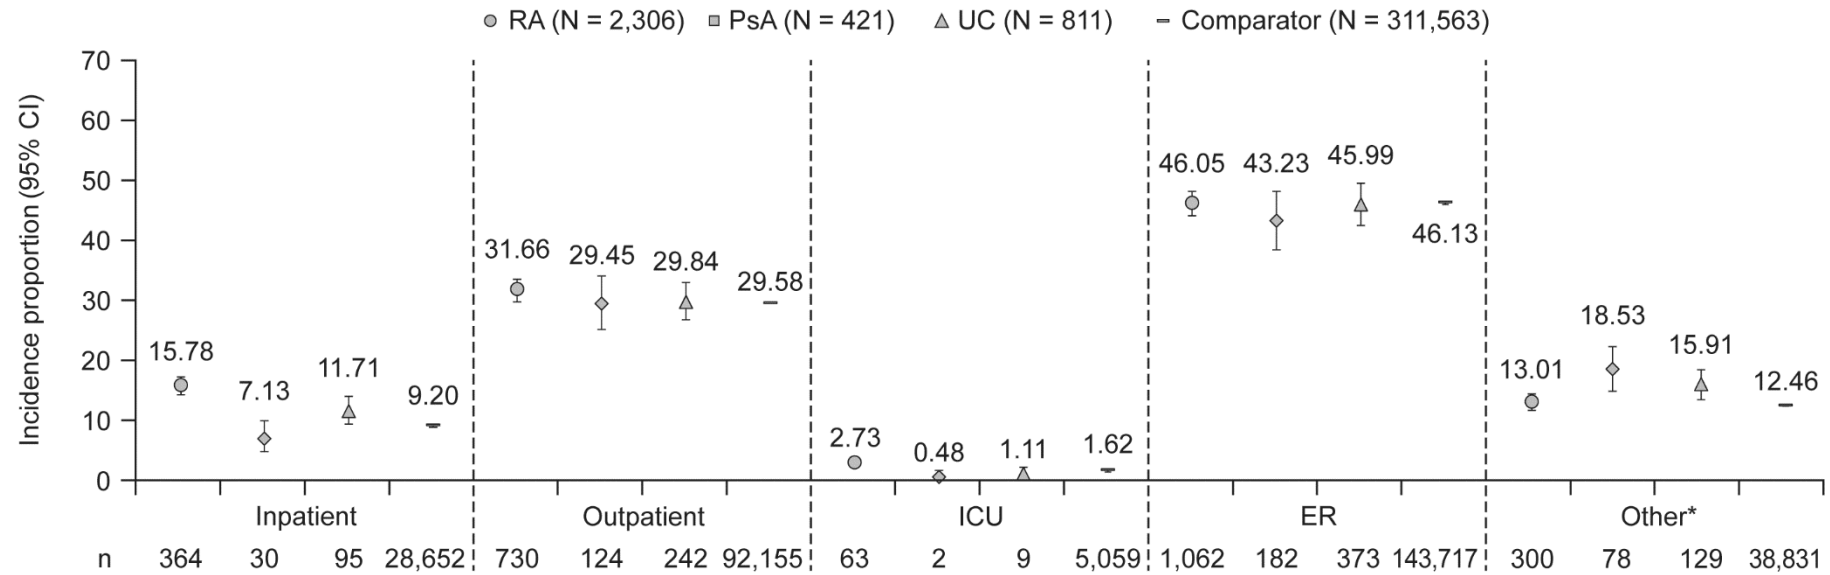

CI: confidence interval; ER: emergency room; ICU: intensive care unit; N: number of patients in the cohort; n: number of patients in the specified category; PsA: psoriatic arthritis; RA: rheumatoid arthritis; UC, ulcerative colitis. \*Only includes patients who do not have inpatient, outpatient, ICU, or ER records for COVID-19 diagnosis. Diagnosis sites are not mutually exclusive.



**Supplementary Figure 2. Incidence of hospitalization, ICU admission, in-hospital death, and all-cause mortality in the (A) RA cohort, (B) PsA cohort, and (C) UC cohort, by baseline systemic therapy.**



95% CIs are not calculated for incidence proportions of 0.00. CI: confidence interval; csDMARD: conventional synthetic disease-modifying antirheumatic drug; ICU: intensive care unit; JAK: Janus kinase; N: number of patients in

the cohort; n: number of patients in the specified category; PsA: psoriatic arthritis; RA: rheumatoid arthritis; TNFi: tumor necrosis factor inhibitor; UC: ulcerative colitis. \*Denominator is the number of patients hospitalized.

**Supplementary Figure 3. Length of hospital stay among hospitalized patients in the indicated and comparator cohorts.**

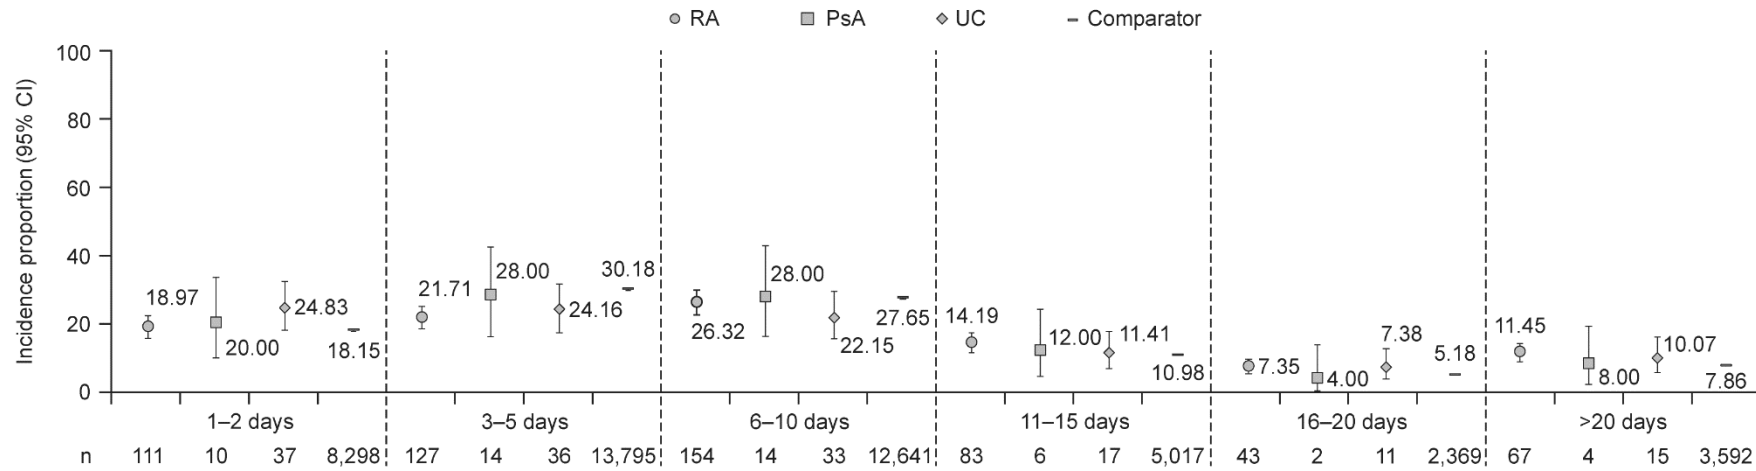

Denominator is the number of patients hospitalized. CI: confidence interval; n: number of patients in the specified category; PsA: psoriatic arthritis; RA: rheumatoid arthritis; UC: ulcerative colitis.

## Supplementary Figure 4. COVID-19 clinical manifestations or outcomes of interest in patients with RA, by systemic therapy.

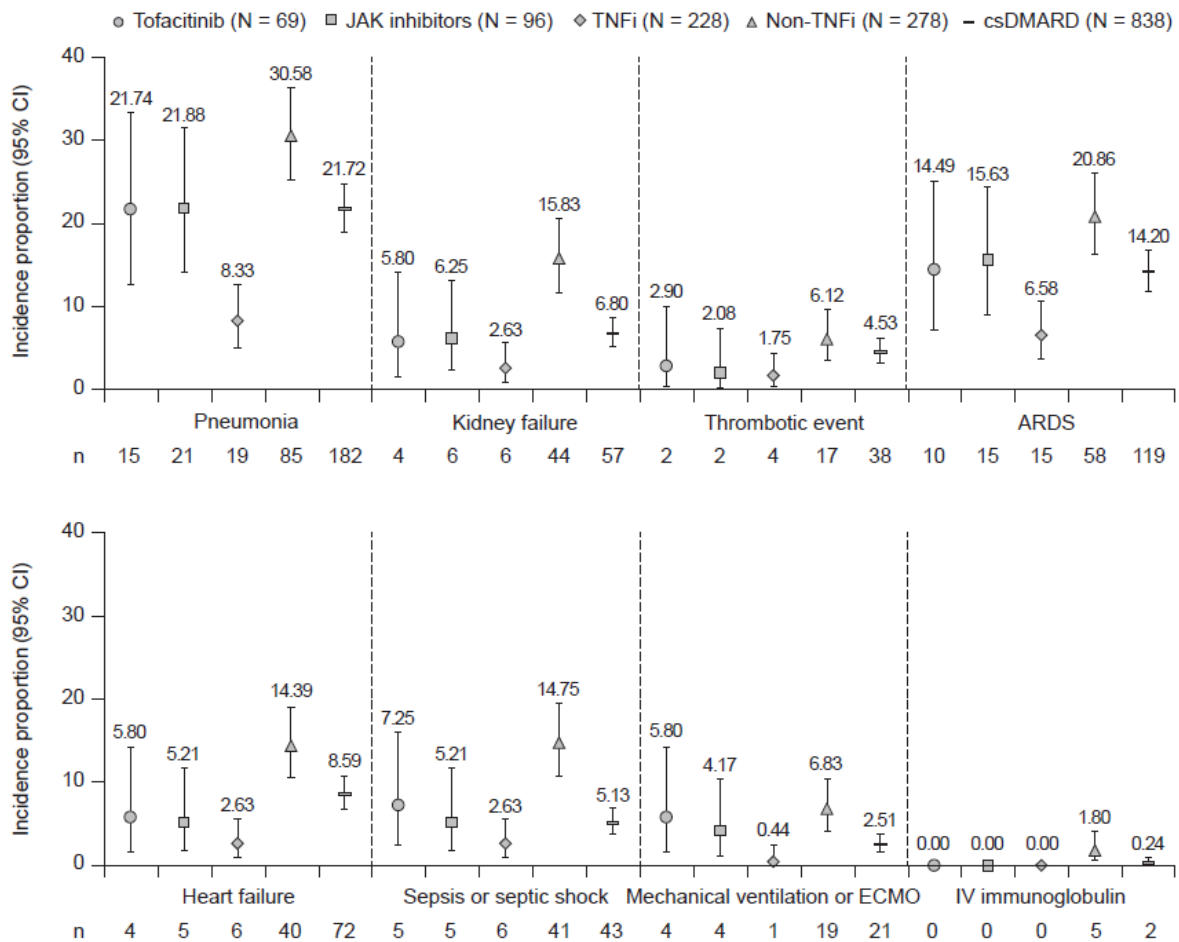

95% CIs are not calculated for incidence proportions of 0.00. IV immunoglobulin was used as an indicator of severe COVID-19. ARDS: acute respiratory distress syndrome; CI: confidence interval; csDMARD: conventional synthetic disease-modifying antirheumatic drug; ECMO: extracorporeal membrane oxygenation; IV: intravenous; JAK: Janus kinase; N: number of patients in the cohort; n: number of patients in the specified category; RA: rheumatoid arthritis; TNFi: tumor necrosis factor inhibitor.

### Supplementary Figure 5. COVID-19 clinical manifestations or outcomes of interest in patients with PsA, by systemic therapy.

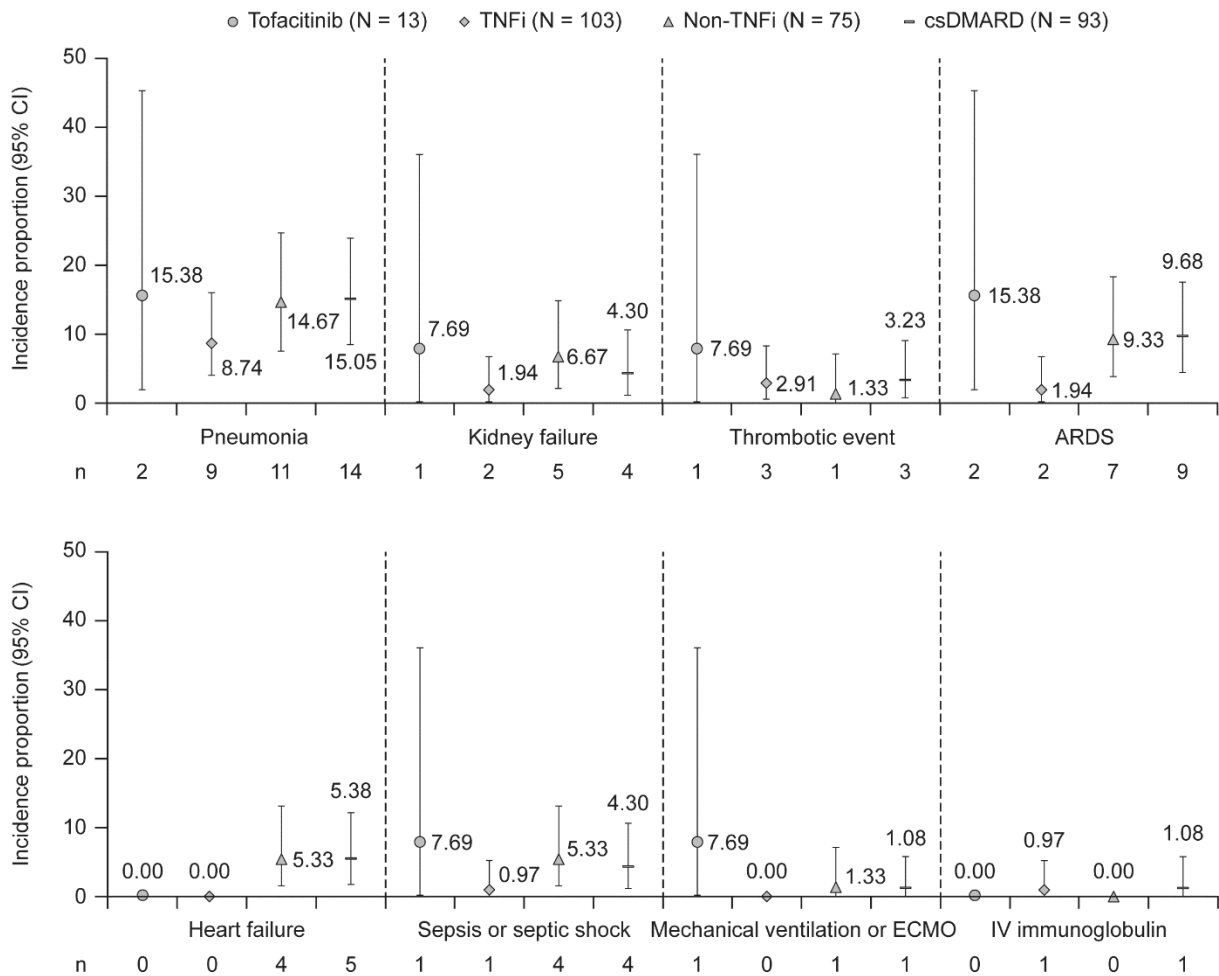

95% CIs are not calculated for incidence proportions of 0.00. IV immunoglobulin was used as an indicator of severe COVID-19. All patients in the PsA cohort who were receiving a JAK inhibitor were receiving tofacitinib. ARDS: acute respiratory distress syndrome; CI: confidence interval; csDMARD: conventional synthetic disease-modifying antirheumatic drug; ECMO: extracorporeal membrane oxygenation; IV: intravenous; JAK: Janus kinase; N: number of patients in the cohort; n: number of patients in the specified category; PsA: psoriatic arthritis; TNFi: tumor necrosis factor inhibitor.

## Supplementary Figure 6. COVID-19 clinical manifestations/outcomes of interest in patients with UC, by systemic therapy.

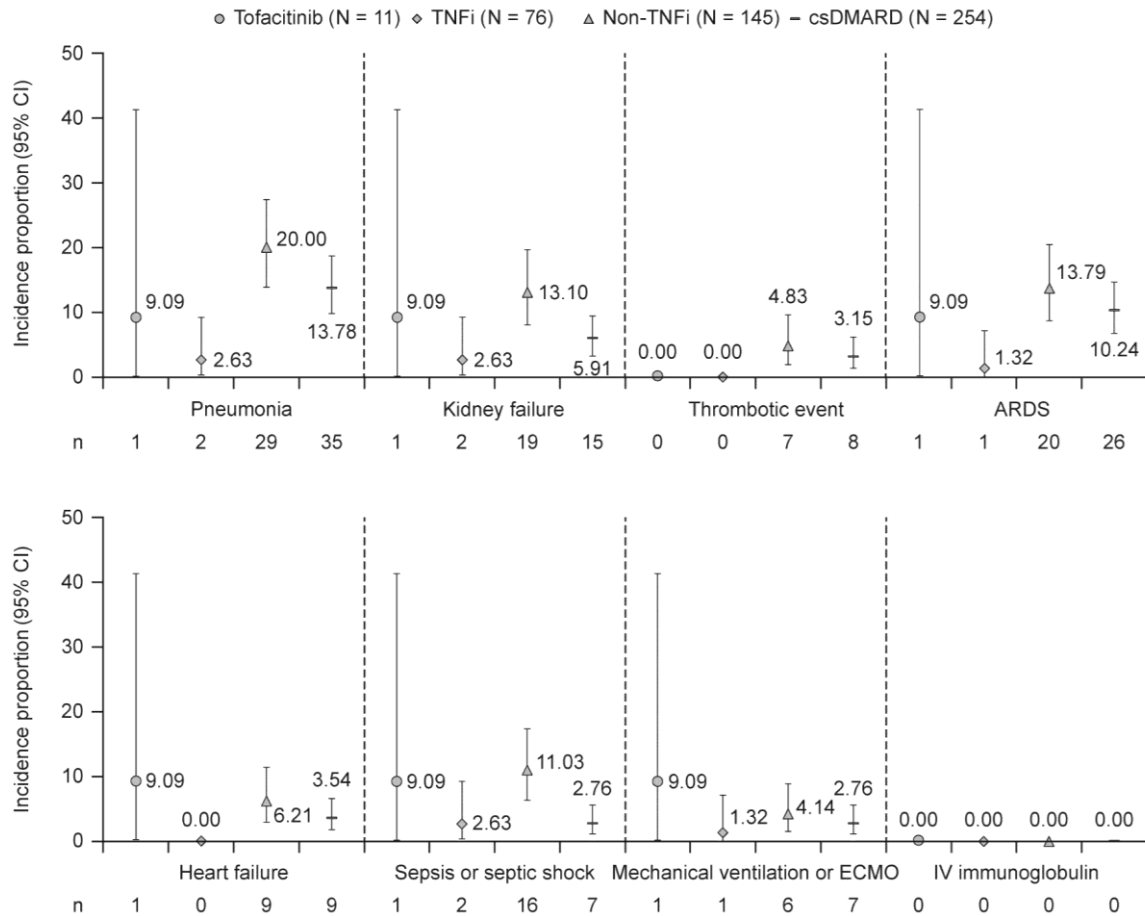

95% CIs are not calculated for incidence proportions of 0.00. IV immunoglobulin was used as an indicator of severe COVID-19. All patients in the UC cohort who were receiving a JAK inhibitor were receiving tofacitinib. ARDS: acute respiratory distress syndrome; CI: confidence interval; csDMARD: conventional synthetic disease-modifying antirheumatic drug; ECMO: extracorporeal membrane oxygenation; IV: intravenous; JAK: Janus kinase; N: number of patients in the cohort; n: number of patients in the specified category; TNFi: tumor necrosis factor inhibitor; UC: ulcerative colitis.
